# Supplementary material
Source: PubMed Central journal article supplement (PMC3049523)

# Supplementary Figure 1

A) Cyst formation

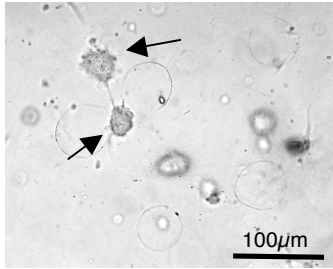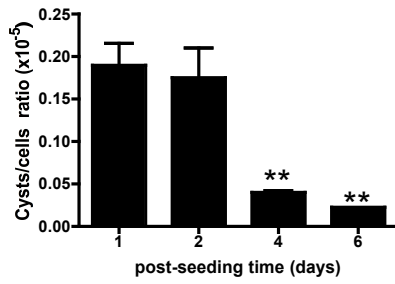

B) Formation of intercrystal connections

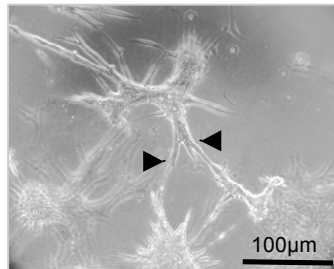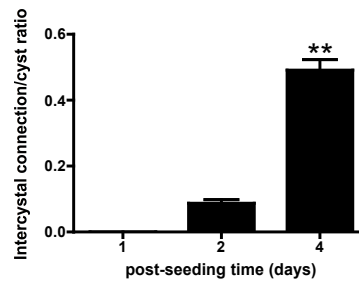

C) Tube formation

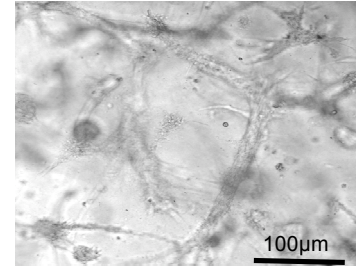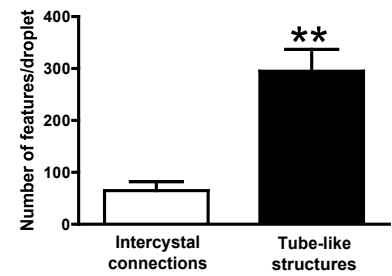

Supplement: jcbfm2010148x1.pdf [file jcbfm2010148x1.pdf]
