# Supplementary material
Source: PubMed Central journal article supplement (PMC3049523)

## Supplementary Figure 2

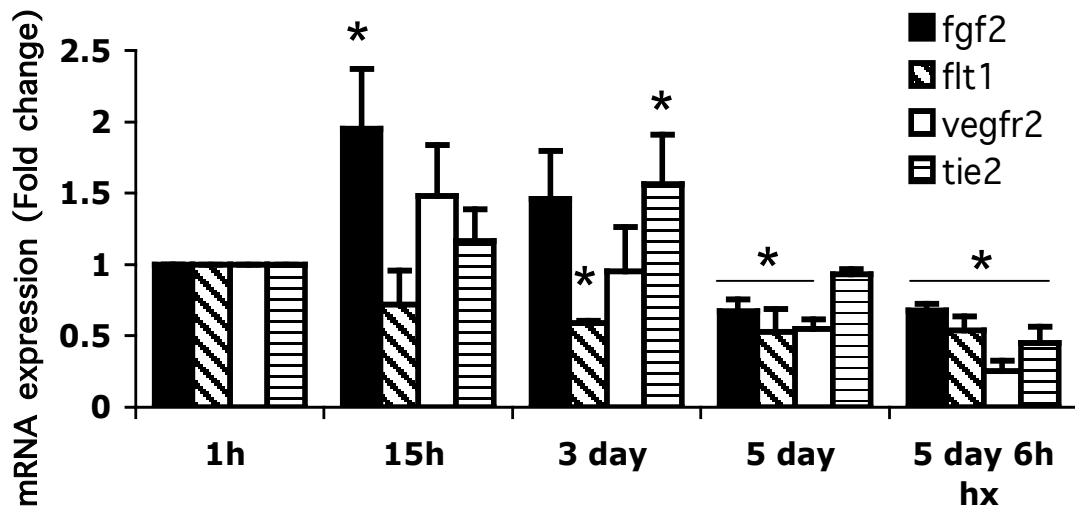

Supplement: jcbfm2010148x2.pdf [file jcbfm2010148x2.pdf]

# Supplementary Figure 3

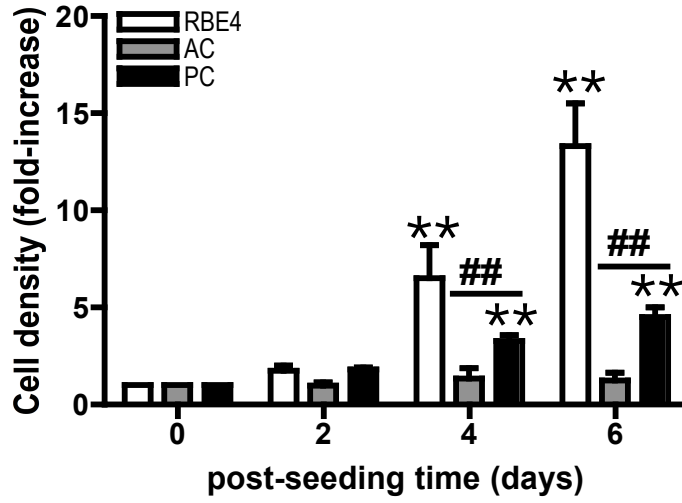

Supplement: jcbfm2010148x3.pdf [file jcbfm2010148x3.pdf]

## Supplementary Figure 4

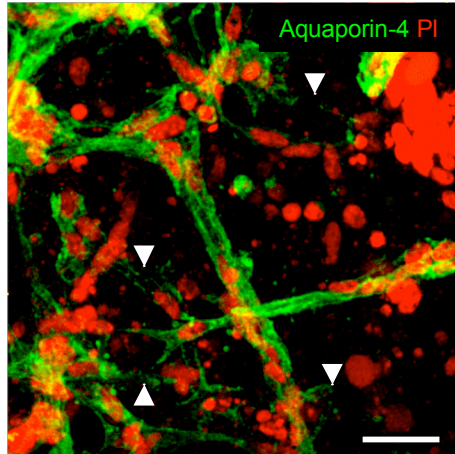

Supplement: jcbfm2010148x4.pdf [file jcbfm2010148x4.pdf]
